# Supplementary material
Source: Elsevier journal article supplement (https://www.sciencedirect.com/science/article/pii/S021265671400122X)
Supplement: mmc1 [file S021265671400122X:mmc1.pdf]

# Cuestionario de Pittsburg de Calidad de sueño.

Nombre:..... ID#.....Fecha:.....Edad:.....

## Instrucciones:

Las siguientes cuestiones solo tienen que ver con sus hábitos de sueño durante el **último** mes. En sus respuestas debe reflejar cual ha sido su comportamiento durante la mayoría de los días y noches del pasado mes. Por favor, conteste a todas las cuestiones.

1.- Durante el último mes, ¿cuál ha sido, normalmente, su hora de acostarse?

2.- ¿Cuánto tiempo habrá tardado en dormirse, normalmente, las noches del último mes? (Marque con una X la casilla correspondiente)

| Menos de 15 min | Entre 16-30 min | Entre 31-60 min | Más de 60 min |
|-----------------|-----------------|-----------------|---------------|
|                 |                 |                 |               |

3.- Durante el último mes, ¿a qué hora se ha levantado habitualmente por la mañana?

4.- ¿Cuántas horas calcula que habrá dormido verdaderamente cada noche durante el último mes?

5.- Durante el último mes, cuántas veces ha tenido usted problemas para dormir a causa de:

a) No poder conciliar el sueño en la primera media hora:

- Ninguna vez en el último mes
- Menos de una vez a la semana
- Una o dos veces a la semana
- Tres o más veces a la semana

b) Despertarse durante la noche o de madrugada:

- Ninguna vez en el último mes
- Menos de una vez a la semana
- Una o dos veces a la semana
- Tres o más veces a la semana

c) Tener que levantarse para ir al servicio:

- Ninguna vez en el último mes
- Menos de una vez a la semana

Una o dos veces a la semana

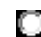

Tres o más veces a la semana



**d) No poder respirar bien:**

Ninguna vez en el último mes

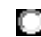

Menos de una vez a la semana



Una o dos veces a la semana

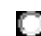

Tres o más veces a la semana



**e) Toser o roncar ruidosamente:**

Ninguna vez en el último mes



Menos de una vez a la semana



Una o dos veces a la semana



Tres o más veces a la semana

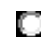

**f) Sentir frío:**

Ninguna vez en el último mes

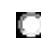

Menos de una vez a la semana



Una o dos veces a la semana



Tres o más veces a la semana



**g) Sentir demasiado calor:**

Ninguna vez en el último mes



Menos de una vez a la semana



Una o dos veces a la semana



Tres o más veces a la semana

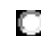

**h) Tener pesadillas o malos sueños:**

Ninguna vez en el último mes



Menos de una vez a la semana



Una o dos veces a la semana



Tres o más veces a la semana

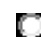

**i) Sufrir dolores:**

Ninguna vez en el último mes

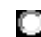

Menos de una vez a la semana

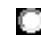

Una o dos veces a la semana

Tres o más veces a la semana

**j) Otras razones. Por favor descríbalas:**

Ninguna vez en el último mes

Menos de una vez a la semana

Una o dos veces a la semana

Tres o más veces a la semana

**6) Durante el último mes, ¿cómo valoraría en conjunto, la calidad de su sueño?**

Muy buena

Bastante buena

Bastante mala

Muy mala

**7) Durante el último mes, ¿cuántas veces habrá tomado medicinas (por su cuenta o recetadas por el médico) para dormir?**

Ninguna vez en el último mes

Menos de una vez a la semana

Una o dos veces a la semana

Tres o más veces a la semana

**8) Durante el último mes, ¿cuántas veces ha sentido somnolencia mientras conducía, comía o desarrollaba alguna otra actividad?**

Ninguna vez en el último mes

Menos de una vez a la semana

Una o dos veces a la semana

Tres o más veces a la semana

**9) Durante el último mes, ¿ha representado para usted mucho problema el tener ánimos para realizar alguna de las actividades detalladas en la pregunta anterior?**

Ningún problema

Sólo un leve problema

Un problema

Un grave problema

**10) ¿Duerme usted solo o acompañado?**

- Solo
- Con alguien en otra habitación
- En la misma habitación, pero en otra cama
- En la misma cama

**Instrucciones para la baremación del test de Calidad de Sueño de Pittsburgh (PSQI).**

El PSQI contiene un total de 19 cuestiones, agrupadas en 10 preguntas. Las 19 cuestiones se combinan para formar siete áreas con su puntuación correspondiente, cada una de las cuales muestra un rango comprendido entre 0 y 3 puntos. En todos los caso una puntuación de "0" indica facilidad, mientras que una de 3 indica dificultad severa, dentro de su respectiva área. La puntuación de las siete áreas se suman finalmente para dar una puntuación global, que oscila entre 0 y 21 puntos. "0" indica facilidad para dormir y "21" dificultad severa en todas las áreas.

**Ítem 1: Calidad Subjetiva de Sueño**

**Examine la pregunta nº6 y asigne la puntuación:**

| Respuesta:     | Puntuación: |
|----------------|-------------|
| Muy buena      | 0           |
| Bastante Buena | 1           |
| Bastante Mala  | 2           |
| Muy Mala       | 3           |

Puntuación Ítem 1: \_\_\_\_\_

**Ítem 2: Latencia de Sueño**

**1. Examine la pregunta nº2 y asigne la puntuación:**

| Respuesta:    | Puntuación: |
|---------------|-------------|
| ≤15 minutos   | 0           |
| 16-30 minutos | 1           |
| 31-60 minutos | 2           |
| ≥60 minutos   | 3           |

Puntuación Pregunta 2: \_\_\_\_\_

**2. Examine la pregunta nº5a y asigne la puntuación:**

| Respuesta:                   | Puntuación: |
|------------------------------|-------------|
| Ninguna vez en el último mes | 0           |
| Menos de una vez a la semana | 1           |
| Una o dos veces a la semana  | 2           |

Tres o más veces a la semana 3  
Puntuación Pregunta 5a:\_\_\_\_\_

**3. Sume la pregunta nº2 y nº5a**

Suma de la Pregunta 2 y 5a:\_\_\_\_\_

**4. Asigne la puntuación al ítem 2 como se explica a continuación:**

| Suma de la Pregunta 2 y 5a: | Puntuación: |
|-----------------------------|-------------|
| 0                           | 0           |
| 1-2                         | 1           |
| 3-4                         | 2           |
| 5-6                         | 3           |

Puntuación Ítem 2:\_\_\_\_\_

**Ítem 3: Duración del Sueño**

**Examine la pregunta nº4 y asigne la puntuación:**

| Respuesta:        | Puntuación: |
|-------------------|-------------|
| Más de 7 horas    | 0           |
| Entre 6 y 7 horas | 1           |
| Entre 5 y 6 horas | 2           |
| Menos de 5 horas  | 3           |

Puntuación Ítem 3:\_\_\_\_\_

**Ítem 4: Eficiencia habitual de Sueño**

**1. Escriba el número de horas de sueño (Pregunta nº4) aquí:\_\_\_\_\_**

**2. Calcule el número de horas que pasa en la cama:**

a. Hora de levantarse (Pregunta nº3):\_\_\_\_\_

b. Hora de acostarse (Pregunta nº1):\_\_\_\_\_

Hora de levantarse – Hora de acostarse:\_\_\_\_\_ Número de horas que pasas en la cama

**3. Calcule la eficiencia habitual de Sueño como sigue:**

(Número de horas dormidas/Número de horas que pasas en la cama) x 100= Eficiencia Habitual de Sueño (%)

$$\left(\frac{\text{---}}{\text{---}}\right) \times 100 = \text{---}\%$$

**4. Asigne la puntuación al Ítem 4:**

| Eficiencia habitual de sueño (%): | Puntuación: |
|-----------------------------------|-------------|
| >85%                              | 0           |
| 75-84%                            | 1           |
| 65-74%                            | 2           |
| <65%                              | 3           |

Puntuación Ítem 4:\_\_\_\_\_

**Ítem 5: Perturbaciones del sueño**

**1. Examine las preguntas nº5b-j y asigne la puntuación para cada pregunta:**

| Respuesta:                   | Puntuación: |
|------------------------------|-------------|
| Ninguna vez en el último mes | 0           |
| Menos de una vez a la semana | 1           |

|                              |      |
|------------------------------|------|
| Una o dos veces a la semana  | 2    |
| Tres o más veces a la semana | 3    |
| Puntuación 5b                | ____ |
| Puntuación 5c                | ____ |
| Puntuación 5d                | ____ |
| Puntuación 5e                | ____ |
| Puntuación 5f                | ____ |
| Puntuación 5g                | ____ |
| Puntuación 5h                | ____ |
| Puntuación 5i                | ____ |
| Puntuación 5j                | ____ |

**2. Sume las puntuaciones de las preguntas nº5b-j:**

Suma puntuaciones 5b-j: \_\_\_\_\_

**3. Asigne la puntuación del ítem 5:**

|            |             |
|------------|-------------|
| Respuesta: | Puntuación: |
| 0          | 0           |
| 1-9        | 1           |
| 10-18      | 2           |
| 19-27      | 3           |

Puntuación Ítem 5: \_\_\_\_\_

**Ítem 6: Utilización de medicación para dormir**

**Examine la pregunta nº7 y asigne la puntuación**

|                              |             |
|------------------------------|-------------|
| Respuesta:                   | Puntuación: |
| Ninguna vez en el último mes | 0           |
| Menos de una vez a la semana | 1           |
| Una o dos veces a la semana  | 2           |
| Tres o más veces a la semana | 3           |

Puntuación Ítem 6: \_\_\_\_\_

**Ítem 7: Disfunción durante el día**

**1. Examine la pregunta nº8 y asigne la puntuación:**

|                              |             |
|------------------------------|-------------|
| Respuesta:                   | Puntuación: |
| Ninguna vez en el último mes | 0           |
| Menos de una vez a la semana | 1           |
| Una o dos veces a la semana  | 2           |
| Tres o más veces a la semana | 3           |

Puntuación Pregunta 8: \_\_\_\_\_

**2. Examine la pregunta nº9 y asigne la puntuación:**

|                       |             |
|-----------------------|-------------|
| Respuesta:            | Puntuación: |
| Ningún problema       | 0           |
| Sólo un leve problema | 1           |
| Un problema           | 2           |
| Un grave problema     | 3           |

**3. Sume la pregunta nº8 y la nº9**

Suma de la Pregunta 8 y 9: \_\_\_\_\_

**4. Asigne la puntuación del ítem 7:**

| Suma de la Pregunta 8 y 9: | Puntuación: |
|----------------------------|-------------|
| 0                          | 0           |
| 1-2                        | 1           |
| 3-4                        | 2           |
| 5-6                        | 3           |

Puntuación Ítem 7:\_\_\_\_\_

**Puntuación PSQI Total**

Sume la puntuación de los 7 ítems

Puntuación PSQI Total:\_\_\_\_\_
